# Supplementary material for: Tunable multi-color luminescence from a self-assembled cyanostilbene and cucurbit[7]uril in aqueous media
Source: Royal Society of Chemistry journal article supplement (doi:10.1039/c9cc09277c), 2019-12-05
Supplement: c9cc09277c1.pdf [file c9cc09277c1.pdf]

## **Electronic Supplementary Information**

### **Tunable Multi-color Luminescence from a Self-assembled Cyanostilbene and Cucurbit[7]uril in Aqueous Media**

Shubhra Kanti Bhaumik and Supratim Banerjee\*

The Department of Chemical Sciences, Indian Institute of Science Education and Research  
Kolkata, Mohanpur 741246, Nadia, India

Email: [supratim.banerjee@iiserkol.ac.in](mailto:supratim.banerjee@iiserkol.ac.in)

#### **SUPPORTING INFORMATION**

##### **Contents:**

- 1 General Experimental Methods
- 2 Synthetic Procedures
- 3 Preparation of Stock Solutions
- 4 Titration Procedures
- 5 Spectroscopic Studies of **2CS2** and **12CS12**
- 6 Binding Studies with **CB[7]**
- 7 Calculation of the Ratio of the Aggregate and Host-Guest Complex in the Aqueous Mixture of **12CS12** and **CB[7]** by Spectral Decomposition
- 8 Reversible Luminescence Control
- 9 Computational Studies
- 10 Dynamic Light Scattering (DLS) Measurement
- 11 Scanning Electron Microscope Images
- 12 Quantum Yield Calculation
- 13 Time-correlated Single Photon Counting (TCSPC) Measurement
- 14 NMR Spectral Characterization

#### **1 General Experimental Methods**

All starting materials were purchased from commercially available sources and used without further purification. 4-(pyridin-4-yl)benzaldehyde, (4-(cyanomethyl)phenyl)boronic acid and 4-

bromopyridine hydrochloride were purchased from Combi-Blocks. Cucurbit[7]uril, 1-adamantylamine, Tetrabutylammonium hydroxide 30-hydrate, 1-bromoethane, 1-bromododecane and tert-butanol were purchased from Sigma-Aldrich. UV-Vis spectroscopic measurements were carried out in Agilent Technologies Cary 8454 spectrophotometer. Emission spectroscopic measurements were carried out in Horiba Fluoromax 4 spectrofluorometer. ITC experiments were performed in a Malvern MICROCAL PEAQ-ITC instrument. Fluorescence images were taken under 365 nm UV lamp. SEM images was recorded by using the CARL ZEISS (Model- SUPRA 55VP) instrument. DLS measurement was carried out using Malvern Zetasizer NanoZS. A Horiba Jobin Yvon Fluorocube instrument fitted with a 340 nm diode laser excitation source (with a temporal resolution of 70 ps) was used for the time-resolved fluorescence experiments applying the time correlated single photon counting (TCSPC) method.  $^1\text{H}$  and  $^{13}\text{C}$  NMR were performed on Jeol 400 MHz and Bruker 500 MHz spectrometers.

## 2 Synthetic Procedures

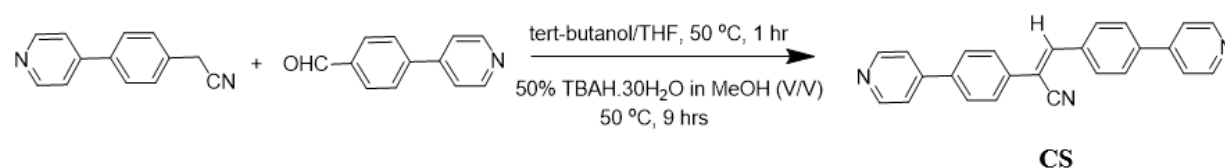

Scheme S1. Synthetic scheme of **CS**

**Procedure for synthesis of CS:** 2-(4-(pyridin-4-yl)phenyl)acetonitrile was first synthesized from (4-(cyanomethyl)phenyl)boronic acid and 4-bromopyridine hydrochloride according to the literature procedure<sup>1</sup>. Then, (Z)-2,3-bis(4-(pyridin-4-yl)phenyl)acrylonitrile (**CS**) was prepared by slight modification as reported in the literature<sup>1</sup>. 4-(pyridin-4-yl)benzaldehyde (340 mg, 1.86 mmol) and 2-(4-(pyridin-4-yl)phenyl)acetonitrile (360 mg, 1.86 mmol) were taken in a 10 mL round bottom flask and dissolved in 6 mL *tert*-butanol and 0.30 mL tetrahydrofuran mixture. The reaction mixture was stirred for 1 hour at 50 °C. 0.8 mL 50% TBAH.30H<sub>2</sub>O in methanol (V/V) was then added dropwise over a period of 15 min at 50 °C until the reaction mixture color became maroon in color. Stirring was continued for 9 more hours at 50 °C and then allowed to cool at room temperature. The yellowish white precipitate formed was then filtered and washed with *tert*-butanol for 3-4 times and finally dried under vacuum. Yield ~ 50%.  $^1\text{H}$  NMR (400 MHz, CDCl<sub>3</sub>):

$\delta$  (ppm) = 8.71 (d,  $J$  = 1 Hz, 4H), 8.05 (d,  $J$  = 8 Hz, 2H), 7.84 (d,  $J$  = 8 Hz, 2H), 7.76 (t,  $J$  = 8 Hz, 4H), 7.66 (s, 1H), 7.56 (t,  $J$  = 4 Hz, 4H).

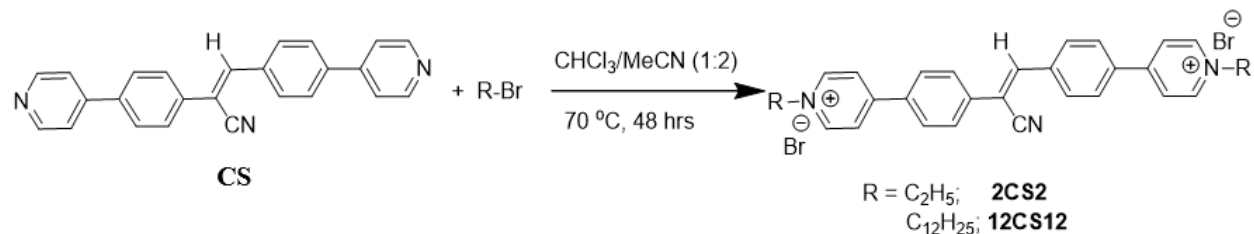

Scheme S2. Synthetic scheme of NCSN ( $N = 2, 12$ )

**General procedure for the synthesis of NCSN ( $N = 2, 12$ ):** CS (55 mg, 1.5 mmol) and corresponding alkyl halide (15 mmol) were taken in 10 mL reaction tube and dissolved in 2 mL acetonitrile and 1 mL chloroform solvents mixture. The reaction mixture was stirred at 70  $^{\circ}\text{C}$  under sealed condition for 48 hours and then allowed to cool at room temperature. The yellow precipitate formed was filtered and washed with cold chloroform for 3-4 times and finally dried under vacuum. 80% - 90% yields were obtained.

$^1\text{H}$  NMR for **2CS2** (400 MHz, DMSO- $\text{D}_6$ ):  $\delta$ (ppm) = 9.20 (t,  $J$  = 8 Hz, 4H), 8.63 (d,  $J$  = 8 Hz, 4H), 8.46 (s, 1H), 8.31 (t,  $J$  = 8 Hz, 4H), 8.24 (d,  $J$  = 8 Hz, 2H), 8.09 (d,  $J$  = 8 Hz, 2H), 4.66 (q,  $J$  = 8 Hz, 4H), 1.59 (t,  $J$  = 8 Hz, 6H);  $^{13}\text{C}$  NMR for **2CS2** (500 MHz, DMSO- $\text{D}_6$ ):  $\delta$ (ppm) = 153.30, 153.27, 144.75, 144.70, 143.25, 136.69, 130.33, 129, 128.73, 127.06, 124.67, 124.58, 117.30, 111.23, 55.57, 16.29; MS (ESI):  $m/z$  calculated for  $\text{C}_{29}\text{H}_{27}\text{N}_3^{2+}$ : 208.6097; found: 208.6097.

$^1\text{H}$  NMR for **12CS12** (400 MHz, DMSO- $\text{D}_6$ ):  $\delta$ (ppm) = 9.17 (t,  $J$  = 8 Hz, 4H), 8.62 (d,  $J$  = 8 Hz, 4H), 8.44 (s, 1H), 8.31 (t,  $J$  = 8 Hz, 4H), 8.23 (d,  $J$  = 8 Hz, 2H), 8.08 (d,  $J$  = 8 Hz, 2H), 4.60 (q,  $J$  = 8 Hz, 4H), 1.95 (br s, 4H), 1.31-1.23 (br s, 36H), 0.85 (t,  $J$  = 8 Hz, 6H);  $^{13}\text{C}$  NMR for **12CS12** (500 MHz, DMSO- $\text{D}_6$ ):  $\delta$ (ppm) = 153.34, 153.31, 144.92, 144.87, 143.26, 136.72, 130.34, 129.02, 128.75, 127.06, 124.67, 124.57, 117.30, 111.27, 60.06, 60.01, 31.24, 30.65, 28.84, 28.76, 28.61, 28.38, 25.42, 22.06, 13.92; MS (ESI):  $m/z$  calculated for  $\text{C}_{49}\text{H}_{67}\text{N}_3^{2+}$ : 348.7662; found: 348.7662.

### 3 Preparation of Stock Solutions

**Preparation of stock solution of cucurbit[7]uril:** A stock solution of **CB[7]** (2 mM) was prepared by dissolving required amount of **CB[7]** in Milli-Q water.

**Preparation of stock solution of 2CS2 and 12CS12:** Stock solutions of **2CS2** and **12CS12** were prepared by dissolving the solid powder of them in spectroscopic grade dimethyl sulfoxide (DMSO).

#### 4 Titration Procedures

**Titration of 2CS2 with CB[7]:** At first, a stock solution of **2CS2** (1mM) in HPLC grade DMSO was diluted 100 times by Milli-Q water to obtain a 10  $\mu$ M solution of **2CS2** in 99 % water-DMSO which was equilibrated for 10 min. Addition of **CB[7]** was done using fresh equilibrated aqueous solution of **2CS2** (10  $\mu$ M) every time to avoid the chance of any possible photoreaction of the cyanostilbene backbone during the titration procedure. After the addition of **CB[7]**, each sample was equilibrated for 10 min before the spectra were recorded.

**Titration of 12CS12 with CB[7]:** At first, a stock solution of **12CS12** (1mM) in HPLC grade DMSO was diluted 100 times by Milli-Q water to obtain 10  $\mu$ M solution of **12CS12** in 99 % water-DMSO and equilibrated for 2 hrs. In this case also, addition of **CB[7]** was done using fresh equilibrated aqueous aggregated solution of **12CS12** (10  $\mu$ M) every time to avoid the chance of any possible photoreaction of the cyanostilbene backbone during the titration procedure. Similarly, after the addition of **CB[7]**, each sample was equilibrated for 10 min before the spectra were recorded.

#### 5 Spectroscopic Studies of 2CS2 and 12CS12

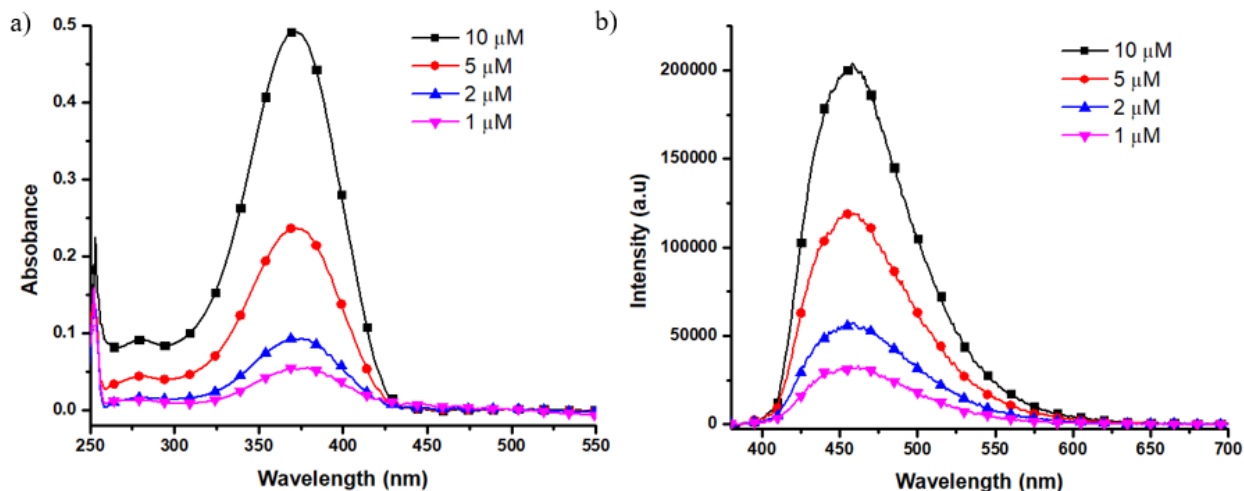

Figure S1. (a) Absorption and (b) emission spectra of **2CS2** at different concentrations in DMSO.

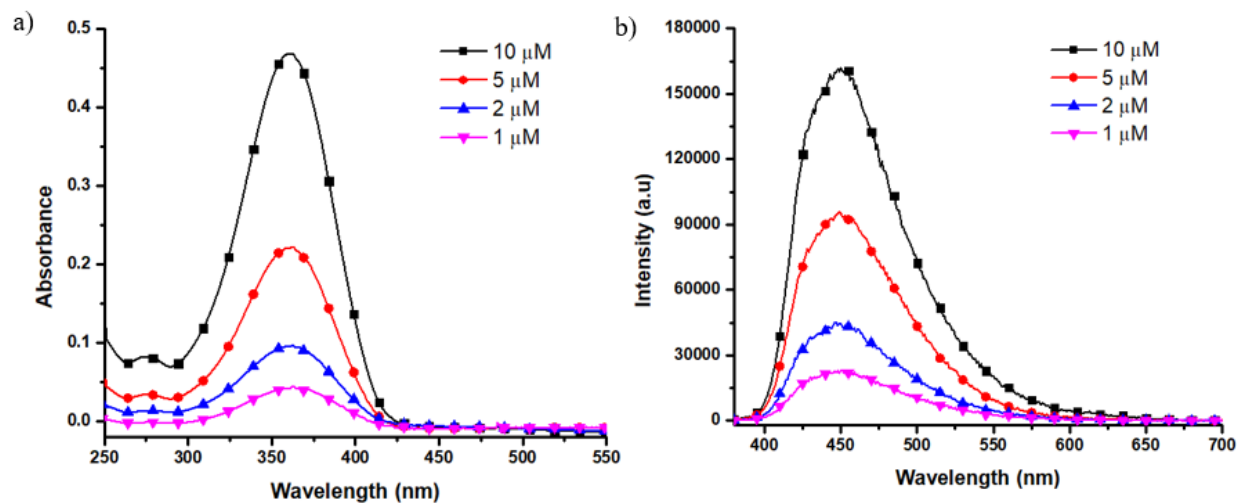

Figure S2. (a) Absorption and (b) emission spectra of **2CS2** at different concentrations in 99% water-DMSO.

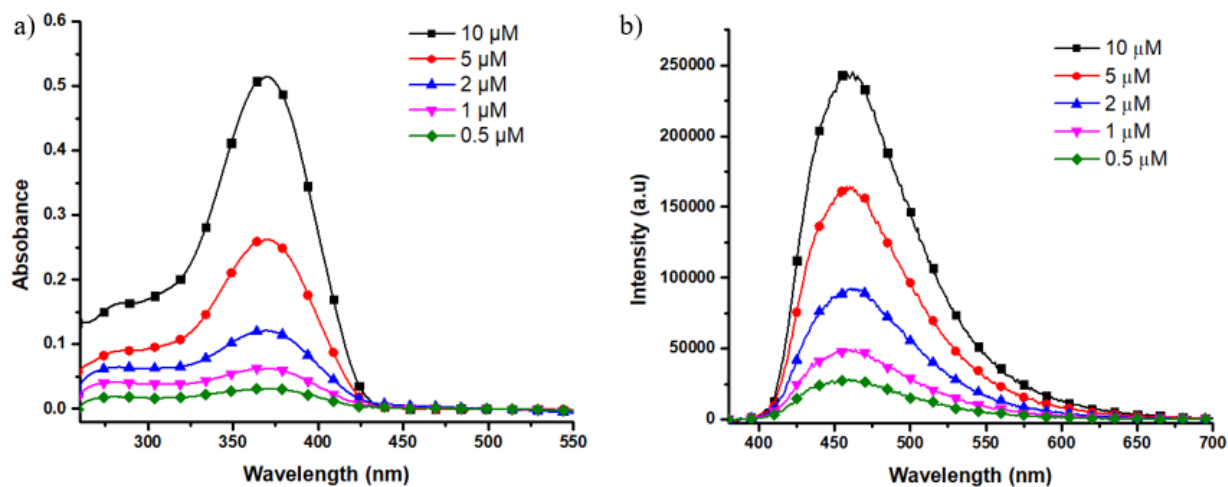

Figure S3. (a) Absorption and (b) emission spectra of **12CS12** at different concentrations in DMSO.

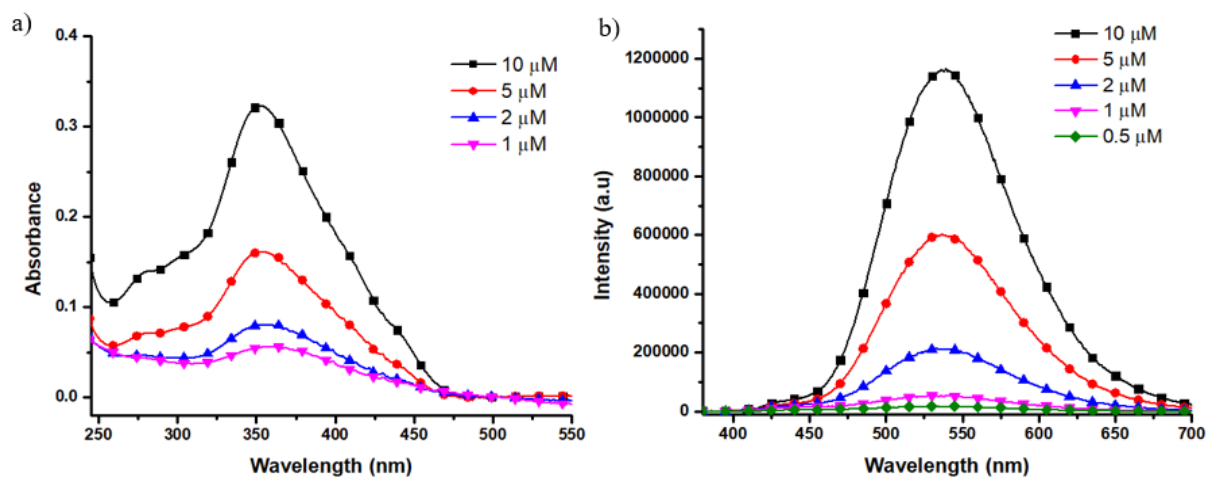

Figure S4. (a) Absorption and (b) emission spectra of **12CS12** at different concentrations in 99% water-DMSO.

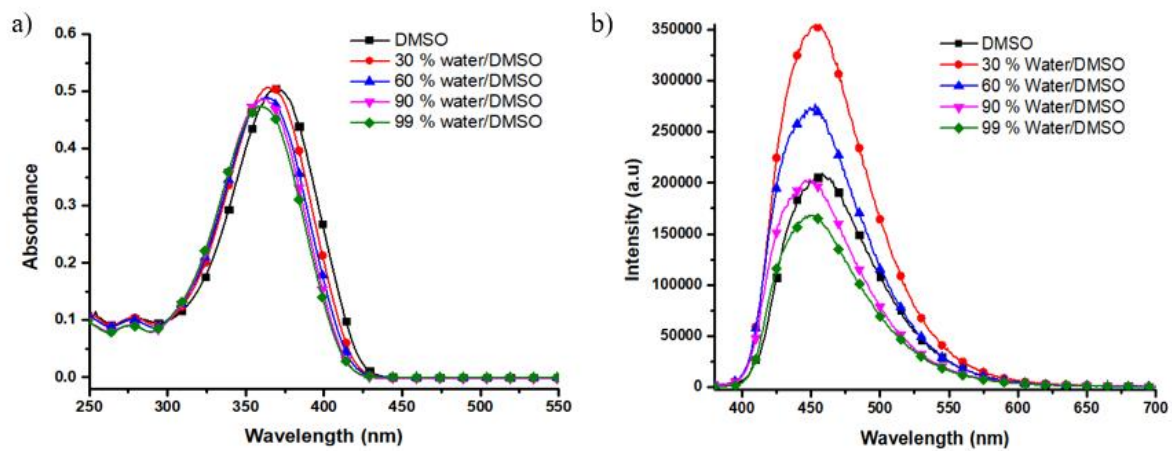

Figure S5. (a) Absorption and (b) emission spectra of **2CS2** (10  $\mu\text{M}$ ) at different water-DMSO fractions.

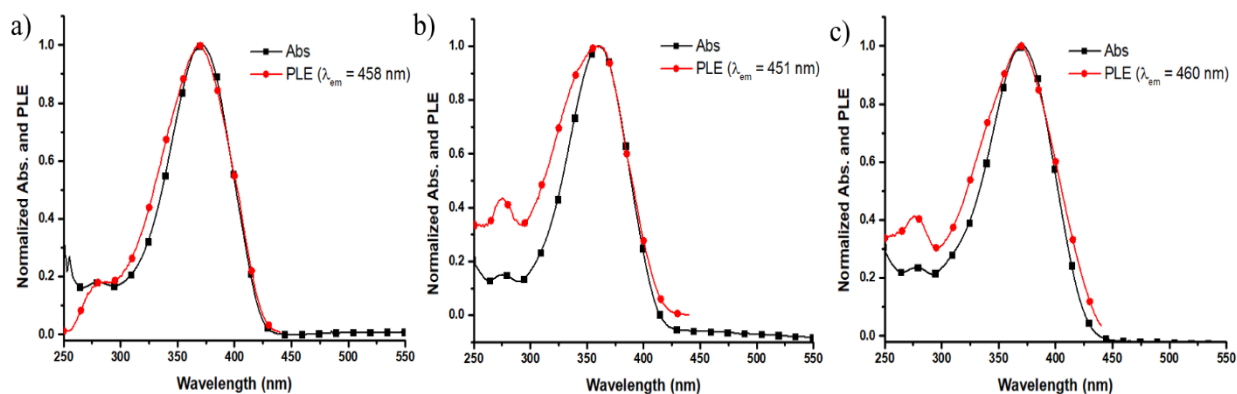

Figure S6. Normalized absorption and photoluminescence excitation spectra of **2CS2** (10  $\mu$ M) in (a) DMSO, (b) 99% water-DMSO and (c) in presence of **CB[7]** (25  $\mu$ M) in 99% water-DMSO.

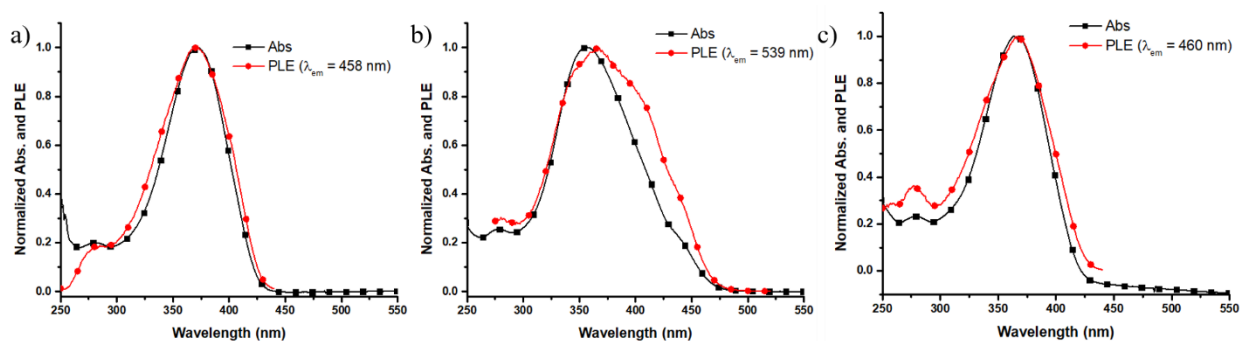

Figure S7. Normalized absorption and photoluminescence excitation spectra of **12CS12** (10  $\mu$ M) in (a) DMSO, (b) 99% water-DMSO and (c) in presence of **CB[7]** (30  $\mu$ M) in 99% water-DMSO.

## 6 Binding Studies with CB[7]

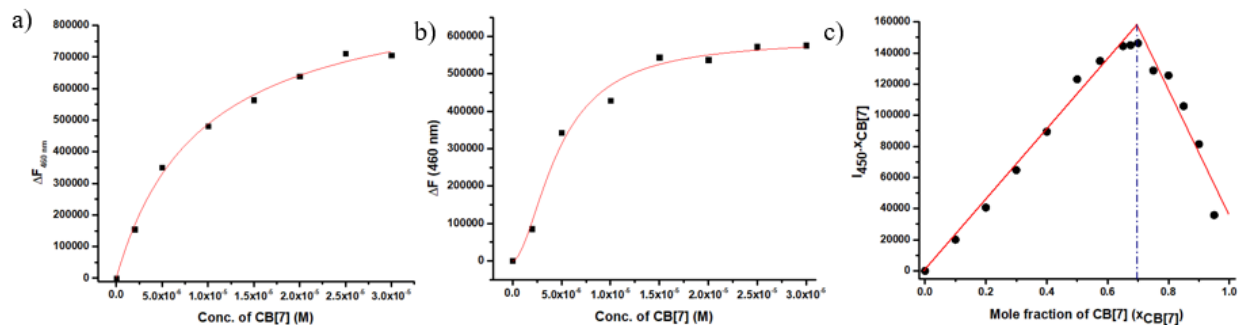

Figure S8.  $\Delta F$  vs conc. of **CB[7]** for (a) **2CS2** (10  $\mu$ M) and (b) **12CS12** (10  $\mu$ M), (c) Job's plot for **2CS2** (10  $\mu$ M) upon addition of **CB[7]** in aqueous medium (2:1 stoichiometry of **CB[7]** to **2CS2**).

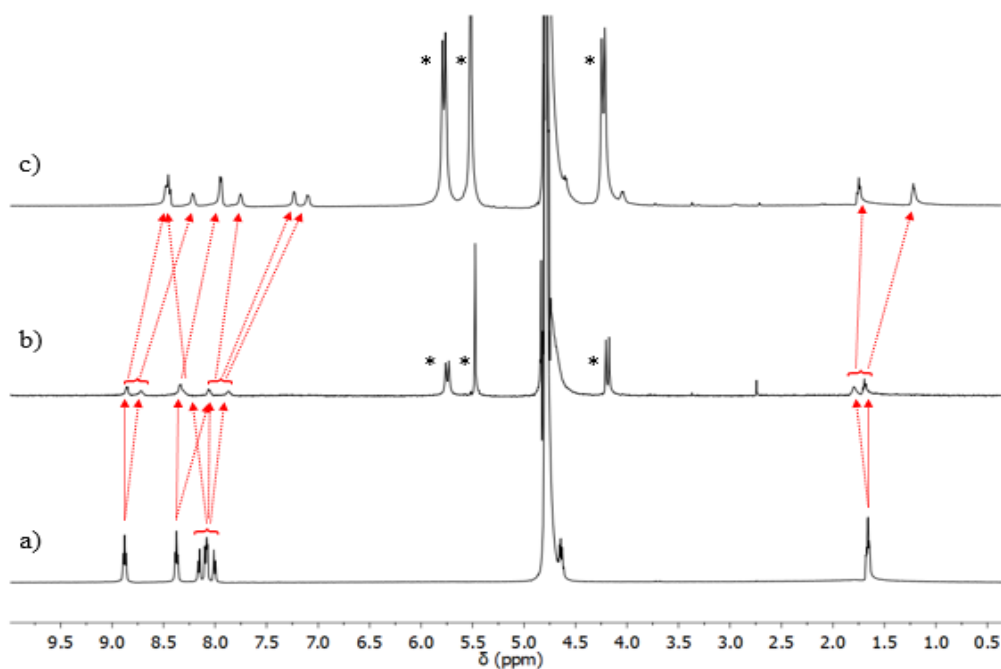

Figure S9.  $^1\text{H}$  NMR spectra of **2CS2** (1 mM) (500 MHz,  $\text{D}_2\text{O}$ ) in the absence (a) and in the presence of 1.0 equiv. (b) and 2.5 equiv. (c) of **CB[7]**. (\* marked peaks are from **CB[7]**).



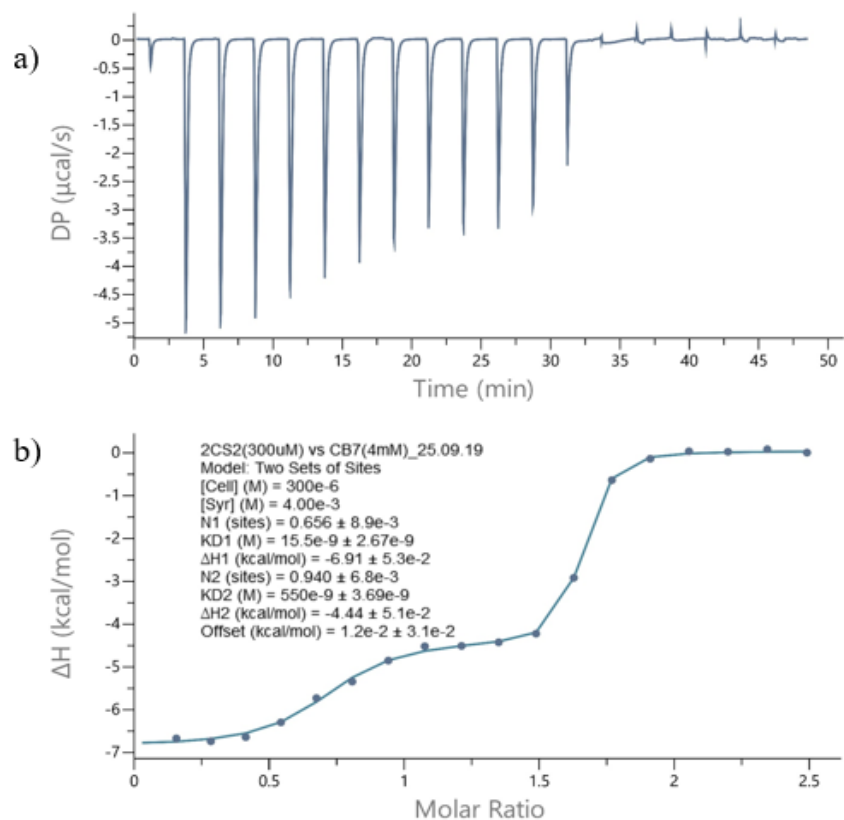

Figure S10. (a) Thermogram obtained during the titration of **2CS2** (300  $\mu\text{M}$ ) in the cell with **CB[7]** (4 mM) in the syringe in water (298.0 K). (b) Fitting of the data to a two sets of binding sites model.

## 7 Calculation of the Ratio of the Aggregate and Host-Guest Complex in the Aqueous Mixture of **12CS12** and **CB[7]** by Spectral Decomposition

In a mixture of **12CS12** and **CB[7]**, three species can co-exist: **12CS12** monomer, **12CS12** aggregate and **12CS12-CB[7]** host-guest complex. However, as the binding constants of the host-guest complex formation were in the order of  $10^7 \text{ M}^{-1}$  (as determined from ITC), we assume that in the examined concentration of **12CS12** (10  $\mu\text{M}$ ), there was no free monomer in the presence of **CB[7]** and everything is in host-guest complex. In order to determine the relative proportions of **12CS12** aggregate and **12CS12-CB[7]** complex in the mixtures of these two components in different ratios, the photoluminescence (PL) spectra of the mixture are expressed as a linear combination of the PL spectra of the aggregate and the PL spectra of the complex. Therefore we

fit the observed normalized PL spectra ( $PL_{obs}(12CS12)$ ) upon addition of **CB[7]** by using the following equation:

$$PL_{obs}(12CS12) = aPL_{agg}(12CS12) + bPL_{com}(12CS12@CB[7]) \quad \dots\dots\dots \text{equation (1)}$$

$PL_{agg}(12CS12)$  and  $PL_{com}(12CS12@CB[7])$  are the normalized PL spectra of the aggregate and the host-guest complex of **12CS12-CB[7]**, respectively whereas a and b are their corresponding fractions in the mixture.

Now, substituting the  $PL_{com}(12CS12@CB[7])$  term in eq. 1 by  $PL_{com}(2CS2@CB[7])$ , the following equation is obtained:

$$PL_{obs}(12CS12) = aPL_{agg}(12CS12) + bPL_{com}(2CS2@CB[7]) \quad \dots\dots\dots \text{equation (2)}$$

The approximate ratio of the aggregates to complex in each composition is calculated using equation 2 as shown in table S1 (spectral decomposition for a mixture with **12CS12** (10  $\mu$ M) and **CB[7]** (10  $\mu$ M) is shown in Fig. S11).

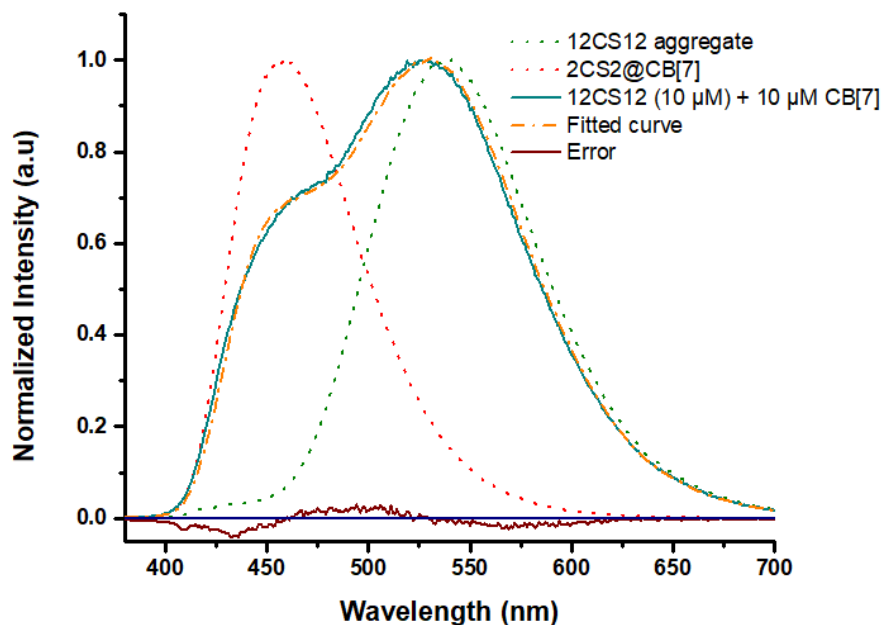

Figure S11. Fitting of PL spectra upon addition of 10  $\mu$ M of **CB[7]** to the aggregated aqueous solution of **12CS12** (10  $\mu$ M).

Table S1. Ratio of the aggregates and the host-guest complex upon addition of **CB[7]** to the aggregated aqueous solution of **12CS12** (10  $\mu\text{M}$ ) as obtained by fitting the normalized PL spectra using equation 2

| Experiment No. | Amount of CB[7] added | Aggregate (%) | Host-Guest Complex (%) |
|----------------|-----------------------|---------------|------------------------|
| 1.             | 2 $\mu\text{M}$       | 92.5          | 07.5                   |
| 2.             | 5 $\mu\text{M}$       | 70.0          | 30.0                   |
| 3.             | 10 $\mu\text{M}$      | 58.3          | 41.7                   |
| 4.             | 15 $\mu\text{M}$      | 50.1          | 49.9                   |
| 5.             | 20 $\mu\text{M}$      | 38.8          | 61.2                   |
| 6.             | 25 $\mu\text{M}$      | 27.1          | 72.9                   |
| 7.             | 30 $\mu\text{M}$      | 20.2          | 79.8                   |

## 8 Reversible Luminescence Control

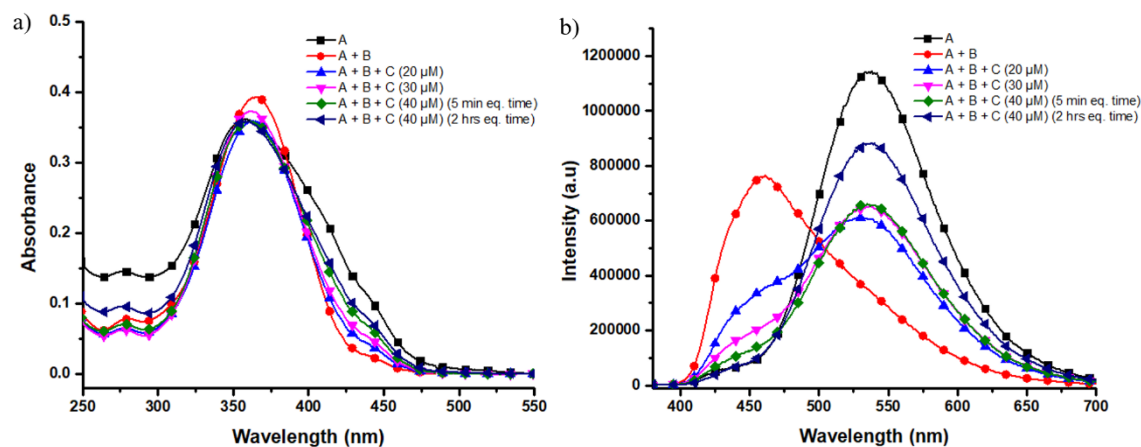

Figure S12. (a) Absorption and (b) emission spectral change of **12CS12** (10  $\mu\text{M}$ )@**CB[7]** (25  $\mu\text{M}$ ) in water upon addition of 1-adamantylamine (**1-ADA**). **A** = **12CS12** (10  $\mu\text{M}$ ), **B** = **CB[7]** (25  $\mu\text{M}$ ) and **C** = **1-ADA**.

## 9 Computational Studies

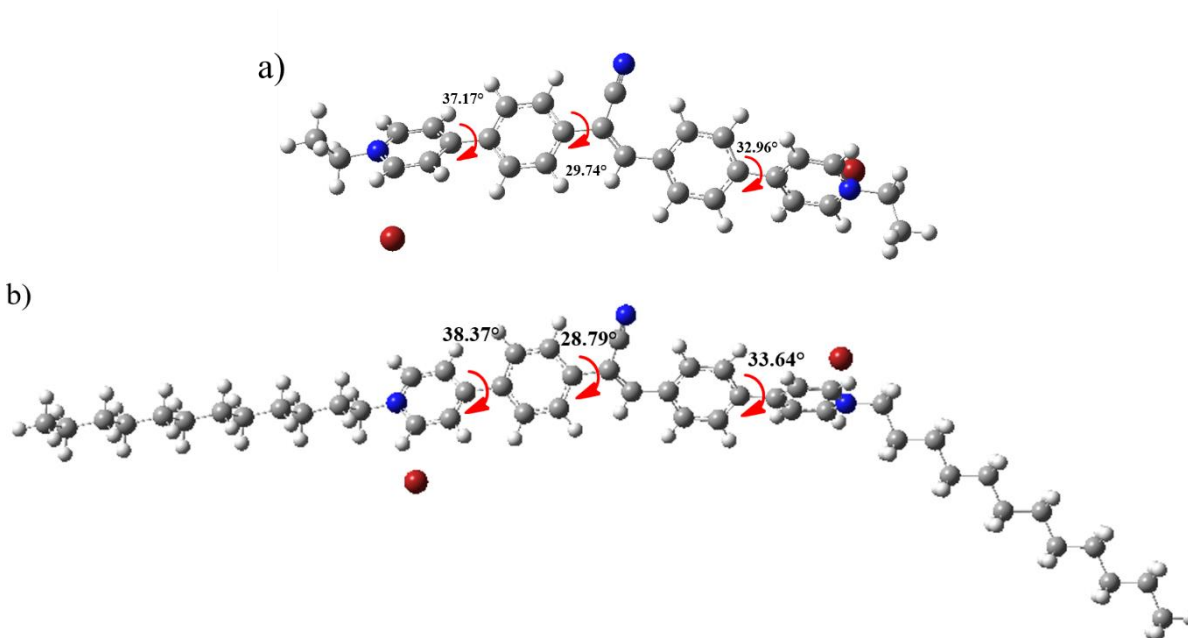

Figure S13. DFT optimized structures of (a) **2CS2** and (b) **12CS12**. Density functional theory (DFT) calculations were carried out to optimize the structure using the B3LYP/6-311++G\*\* level of theory and without imposing any symmetry constraints. Frequency calculations were done at the same level of theory to confirm the nature of stationary points as the real minima ( $N_{\text{img}} = 0$ ) level of theory.

## 10 Scanning Electron Microscope Images

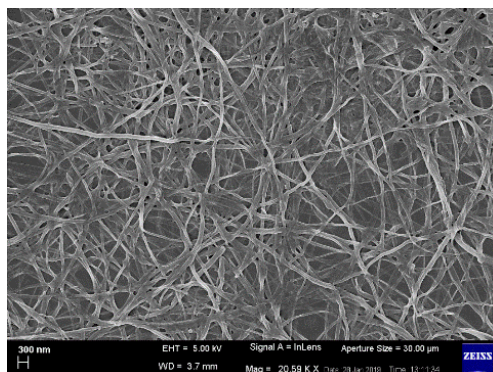

Figure S14. SEM image of aggregated **12CS12** (10  $\mu\text{M}$ )

## 11 Dynamic Light Scattering (DLS) Measurement

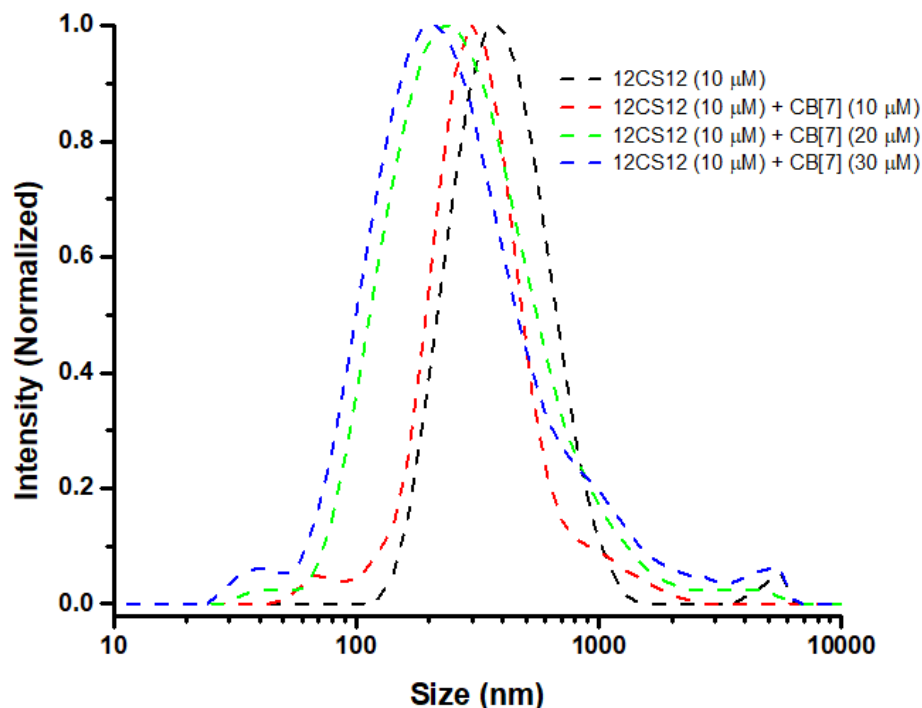

Figure S15. Change in hydrodynamic diameter upon addition of **CB[7]** to aggregated aqueous solution of **12CS12** (10 μM) as measured by DLS.

## 12 Quantum Yield Calculation

Quantum yield of **2CS2** and **2CS2-CB[7]** complex were measured by employing reference method using the following equation<sup>2</sup>

$$Q_f = Q_{ref} \times \frac{a_{ref}}{a_{sam}} \times \frac{A_{smp}}{A_{ref}} \times \left( \frac{n_{sam}}{n_{ref}} \right)^2$$

Where  $Q_f$  and  $Q_{ref}$  are quantum yields (QY),  $A_{sam}$  and  $A_{ref}$  are the areas under the fluorescence spectrum,  $a_{sam}$  and  $a_{ref}$  are the absorbance at excitation wavelength ( $\lambda_{ex} = 366$  nm) of the sample and the reference, respectively.  $n_{sam}$  and  $n_{ref}$  are the refractive indices of the solvents where the sample and the reference were dissolved, respectively. Quinine sulfate in 0.1 M  $H_2SO_4$  was used as the reference dye.

### 13 Time-correlated Single Photon Counting (TCSPC) Measurement

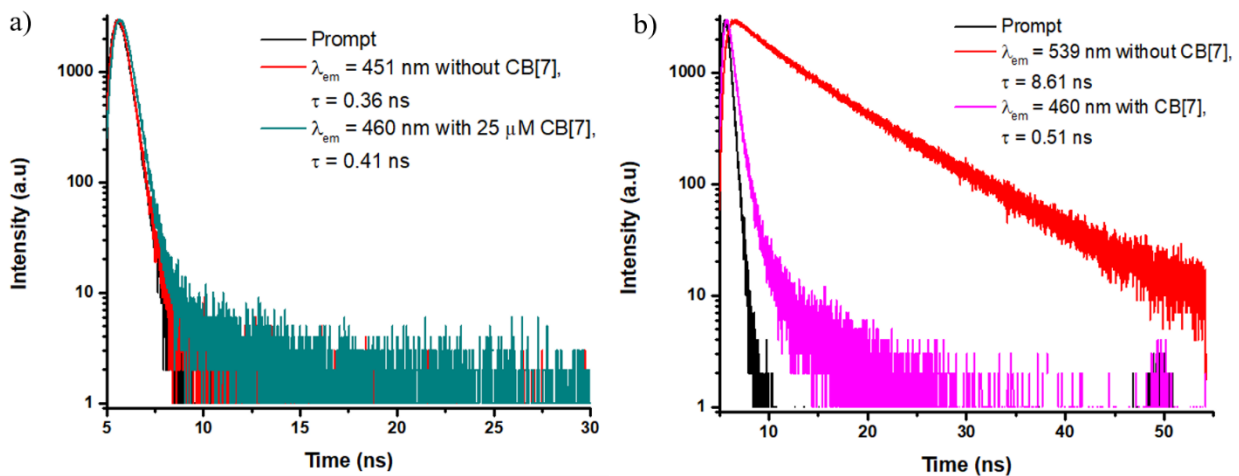

Figure S16. Time resolved decay curves ( $\lambda_{ex} = 340$  nm) of a) **2CS2** (10  $\mu$ M) and b) **12CS12** ( $\mu$ M) with and without **CB[7]** in water.

## 14 NMR Spectral Characterization

### NMR Characterization of 2-(4-(pyridin-4-yl)phenyl)acetonitrile:

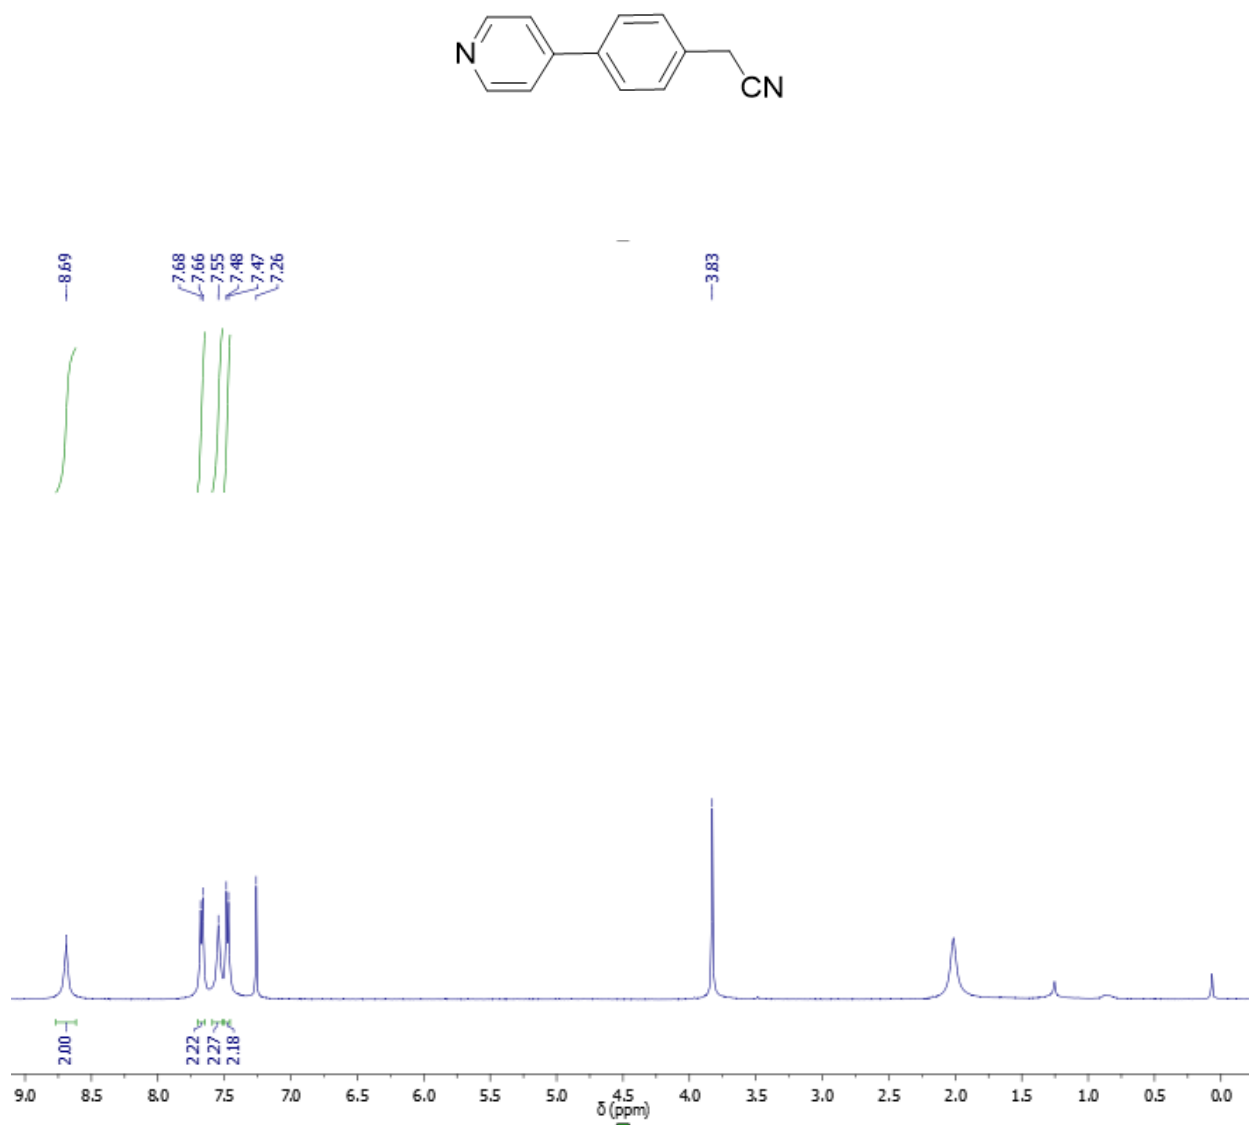

Figure S17. <sup>1</sup>H NMR Spectra of 2-(4-(pyridin-4-yl)phenyl)acetonitrile (500 MHz, CDCl<sub>3</sub>)

# NMR Characterization of CS:

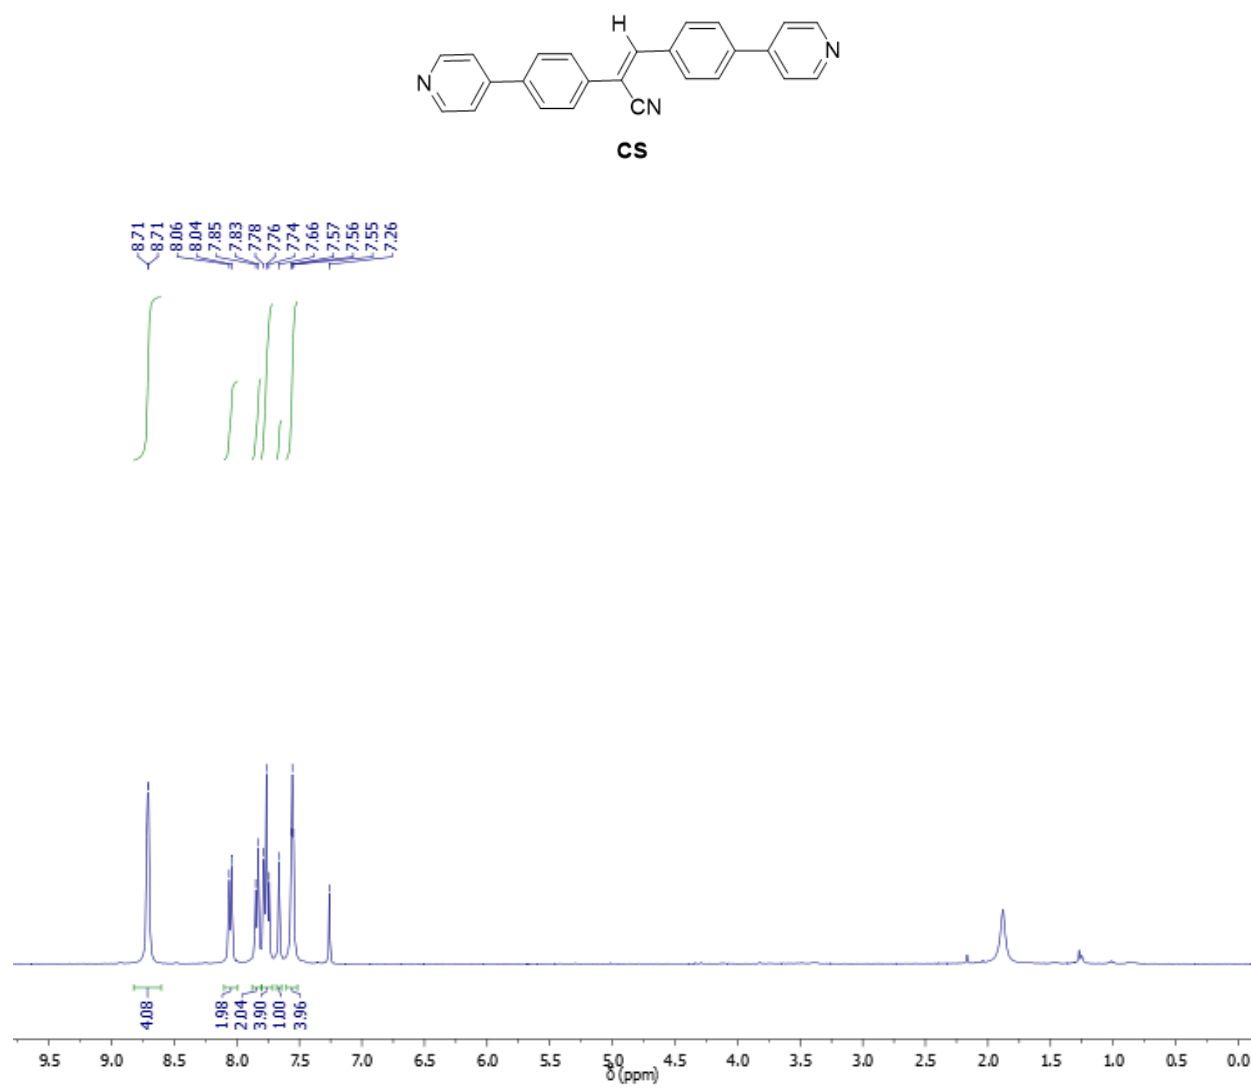

Figure S18.  $^1\text{H}$  NMR Spectra of **CS** (400 MHz,  $\text{CDCl}_3$ )



## NMR Characterization of 2CS2:

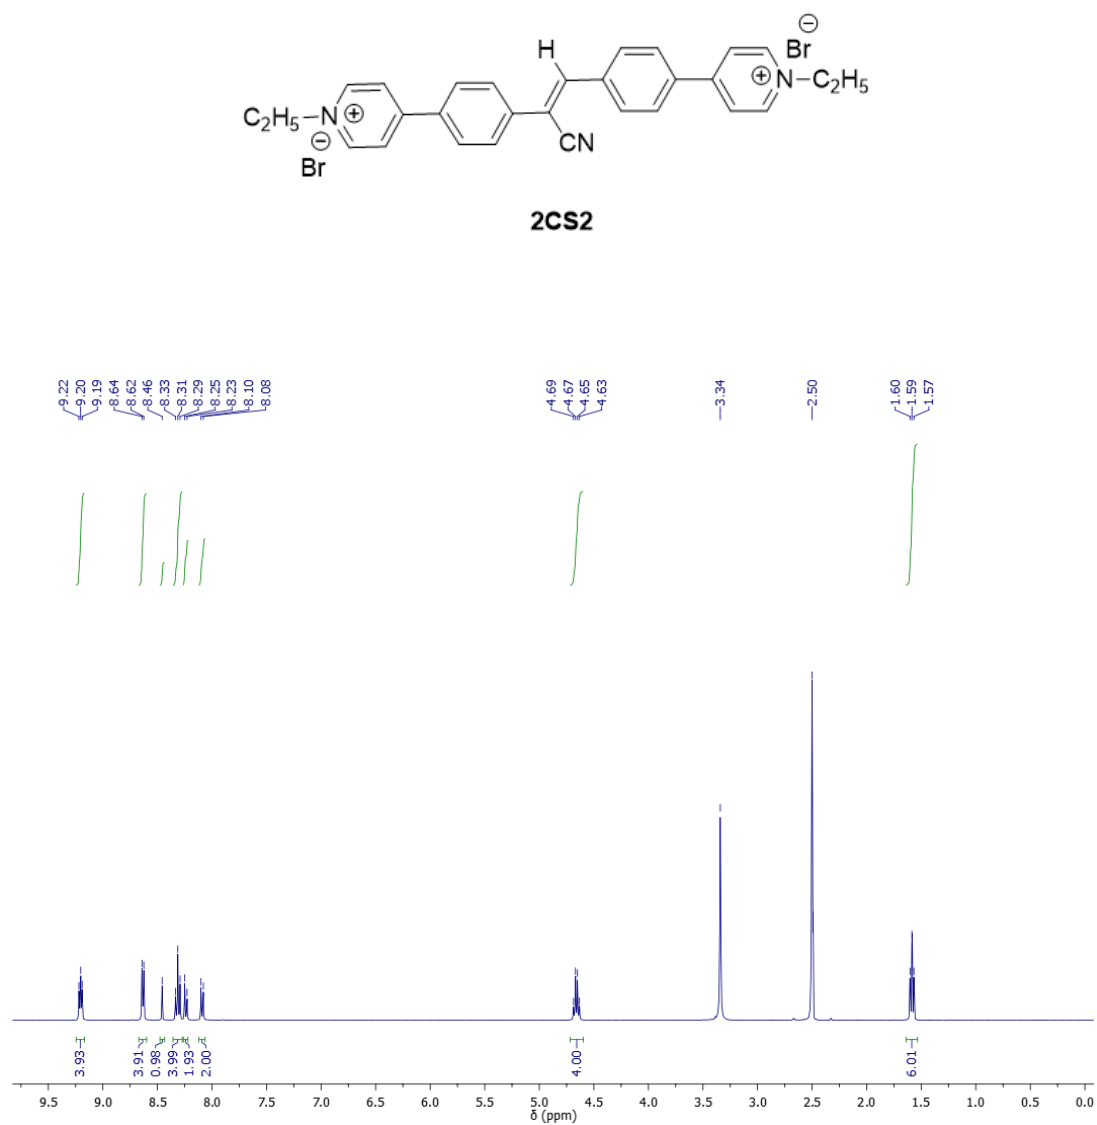

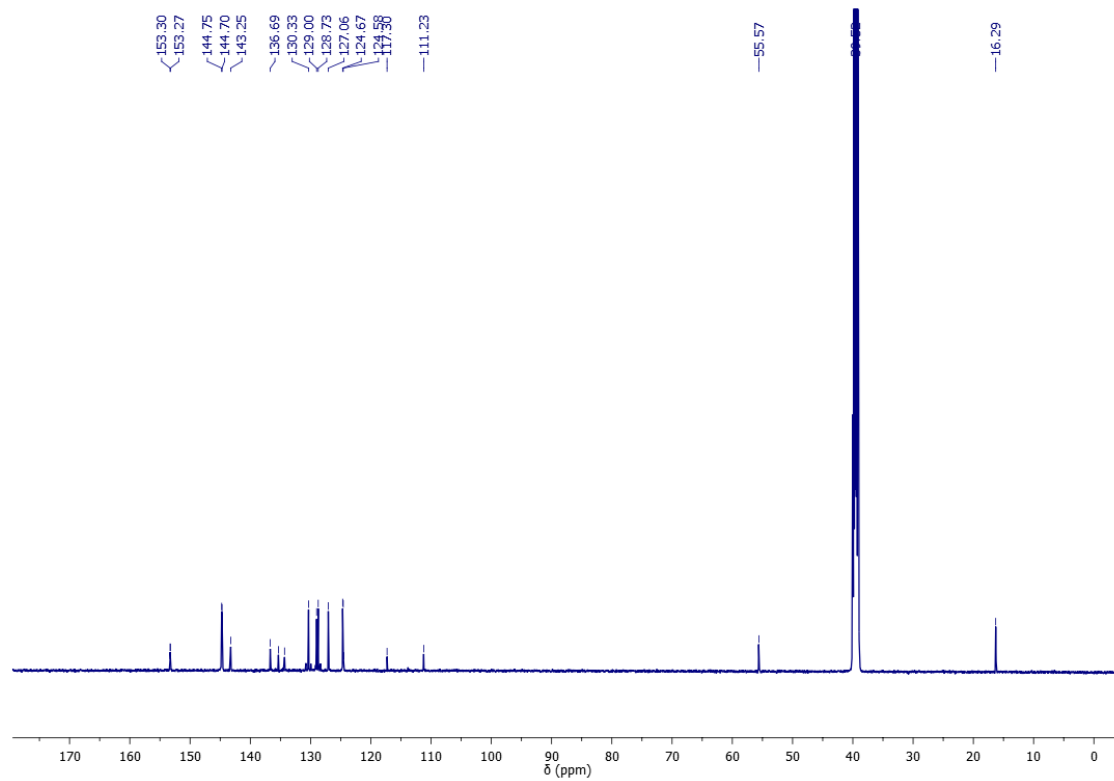

Figure S20. <sup>13</sup>C NMR Spectra of **2CS2** (500 MHz, DMSO-D<sub>6</sub>)

## NMR Characterization of **12CS12**:

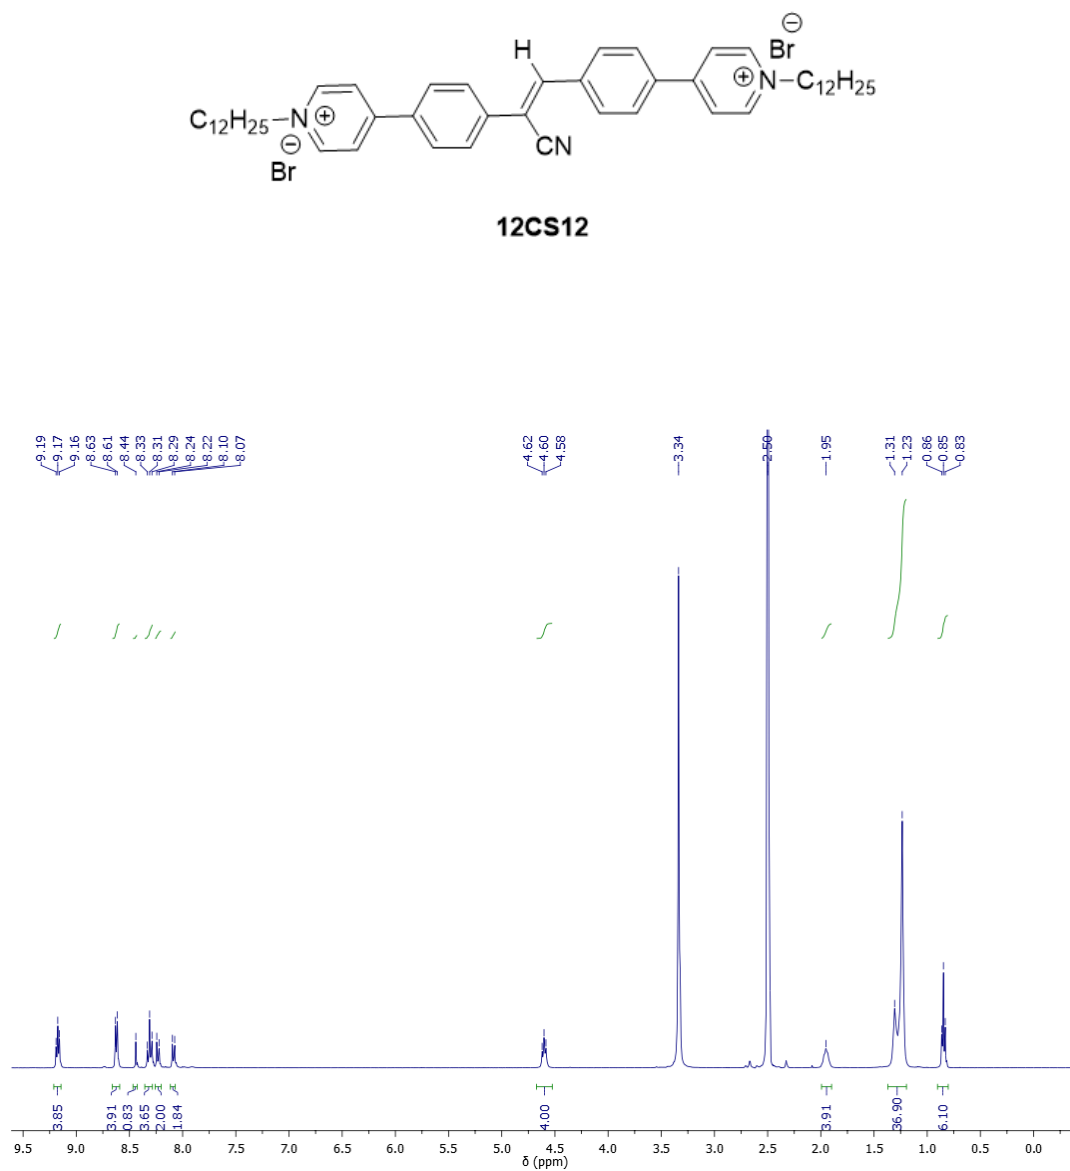

Figure S21.  $^1\text{H}$  NMR Spectra of **12CS12** (400 MHz,  $\text{DMSO-D}_6$ )

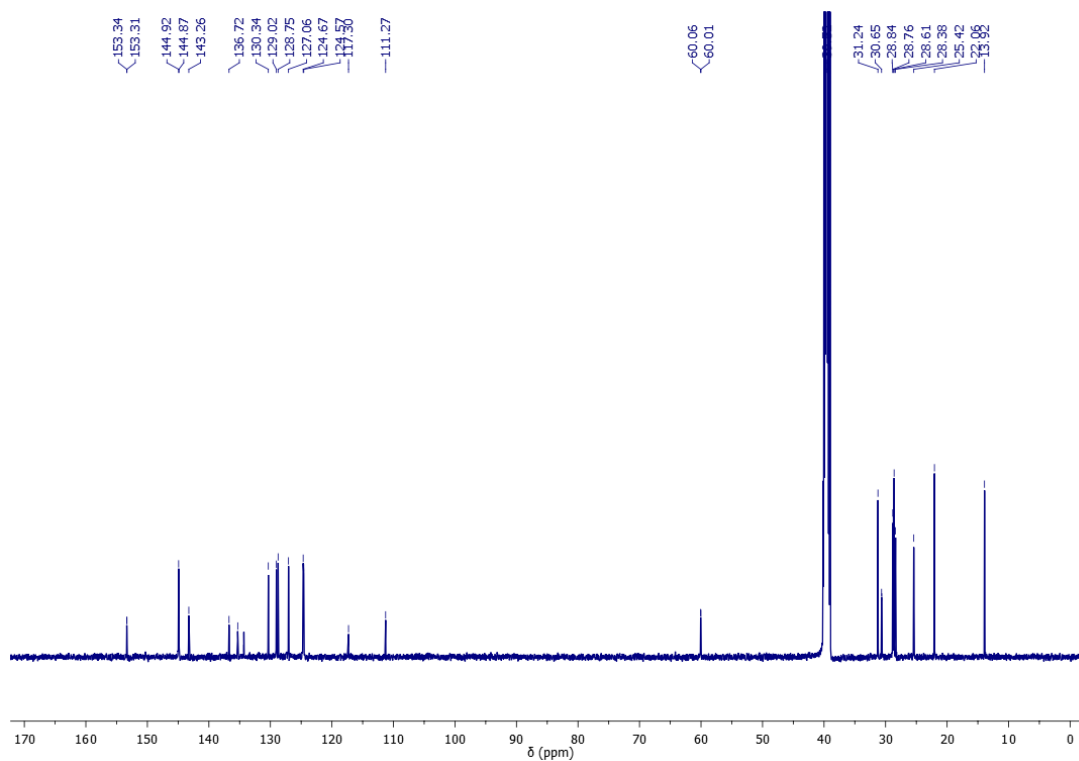

Figure S22.  $^{13}\text{C}$  NMR Spectra of **12CS12** (500 MHz,  $\text{DMSO-D}_6$ )

### References:

- 1 Y. You, H. Yang, J. W. Chung, J. H. Kim, Y. Jung, S. Y. , Park, *Angew. Chem. Int. Ed.*, 2010, **49**, 3757.
- 2 E. Austin, M. Gouterman, *Bioinorg. Chem.*, 1978, **9**, 281.
